# Supplementary material
Source: publisher figshare collection journal article supplement (https://karger.figshare.com/articles/dataset/_/5120371)
Supplement: Supplementary file 1 [file 1]

**Table 4. Primers designed from end-sequences flanking gaps in the contig, used for chromosome walking**

| Originating STS | Sequence (5' – 3')        | BAC(s) used for sequencing |
|-----------------|---------------------------|----------------------------|
| 009I06SP6       | TTTGTGGGAGAGTGGTAGTCACATA | 047B23; 186F05             |
| 009I06SP6       | CCAACAATTTTGGAGGTTAGATTT  | 047B23; 186F05             |
| 047B23SP6       | TATTGGTCCTGTAGCCTGTAGTGA  | 186F05                     |
| 047B23SP6       | TCCTTGAGAAGGCTGGACTTATAC  | 186F05                     |
| 087G16SP6       | TCCTCACTCTGTACGAACTAAG    | 015A14; 181B11             |
| 087G16SP6       | AGGAATGGGGTCACTCACAG      | 015A14; 181B11             |
| 238I22T7        | AGCTGCCACTCTCTCCTCTATTA   | 009F01                     |
| 431M22SP6       | TTGGTCCGTGGTGTCTTTTATTA   | 015A14; 181B11             |
| 431M22SP6       | AAACAGAAATCCTTAATTTCAATGC | 015A14; 181B11             |
