# Supplementary material
Source: publisher figshare collection journal article supplement (https://karger.figshare.com/articles/dataset/_/5120371)
Supplement: Supplementary file 2 [file 1]

**Table 2.** PCR primers designed for STSs obtained from BAC end-sequences. Size of amplicons in base-pairs and PCR conditions (annealing temperature and mM MgCl<sub>2</sub>) for each set of primers is indicated (TD designates that a touchdown program was used).

| STS               | Forward primer (5 –3 )    | Reverse primer (5 –3 )    | Expected size | PCR Condi-<br>tions |
|-------------------|---------------------------|---------------------------|---------------|---------------------|
| 001P14SP6         | AATATAACTGCCTGAACCTTTGTCA | CATGAAGACTTTTCAATTTGTGC   | 230           | 55, 1.5             |
| 001P14T7          | CAGGTAGGACCTTGGGTTC       | CCTCCCTTGCTCACTCTCTG      | 194           | 55, 1.5             |
| 009F01 int 1      | TGGTGTATCGTGTGGCAGAT      | AACGTACTTGCACGCAACAG      | 225           | 63, 1.5             |
| 009F01SP6         | AGGGCATTCTTTGTGCTTA       | GCTCAGAACACGCAGCTCTT      | 208           | 55, 1.5             |
| 009F01T7          | GATTCATGTCAGCCGAACCT      | AGCTGCTCTCAAAATCAAACCTG   | 110           | 58, 1.5             |
| 009I01SP6         | CCTTGTTCCAGGCTTCTGTT      | CTGCCAACAAATTTTGAGGGT     | 230           | 58, 1.5             |
| 011O15SP6         | GGGGTCACTCCTGTCTGTGT      | CCGTAGTGAGAGTGCCTTCA      | 186           | 58, 1.5             |
| 011O15T7          | CATCTTGTCTTTGTGAGTTTGTGG  | GGGTTACAAAGCCTTGAACAAA    | 179           | 60, 1.5             |
| 015A14/181B11 int | TGCTCCCTCCCTCTAGTCAA      | TGAGCCCTGCCCAACTGGA       | 250           | 60, 1.5             |
| 015A14SP6         | TTTTCGAACATGATTCCATTT     | ATTCGTTAATCTGAGTTTTCACA   | 164           | 58, 1.5             |
| 015A14T7          | GGCAGGAAGATGAGCGACTA      | TGGATGACCTCTGTGGTGAA      | 173           | 58, 1.5             |
| 017A17SP6         | AAGTGTGGGGTTCCTCTGGT      | GGCCTAACCAATTCCTACCC      | 150           | 55, 1.5             |
| 017N12SP6         | TGGCTGATGTCAGCAATGAT      | TTTGACTTGCTGCTCTTGGA      | 157           | 58, 1.5             |
| 017N12T7          | TTCCAGGTCAAAGCTGAAGG      | GGCCTCTGAGTATGGGTTGA      | 157           | 58, 1.5             |
| 021G18SP6         | CCGAGACATGAATCACCAAA      | CAACGGGGAAAGAGTCTGTG      | 151           | 58, 1.5             |
| 021G18T7          | ATAGGTGGGAAATGGTGCAG      | TCAGGGTGTCTTCTCAGAC       | 199           | 58, 1.5             |
| 034.1C10M13       | TGTTTGAAGTTTGTATGTTTG     | CATGATGTAATCTACACGAAATTGA | 247           | 58, 1.5             |
| 034.1C10T7        | GGGGAAAGAAGCTTGCAATTAT    | ACCCTACCTGGTCACTTGATT     | 212           | 60, 1.5             |
| 035D14SP6         | CCAGAACTCGTTGACTTGTTC     | ACTCTCTACCACCCAGCAA       | 182           | 58, 1.5             |
| 035D14T7          | ATTTGCGCACATGTCTGTGT      | AGTGGTGCAGGGTGATAAGC      | 157           | 58, 1.5             |
| 038L24T7          | CGGCCTAACACTCATTCCTC      | CCAAGTTCCTTGAATCTTAACAA   | 291           | 60, 1.5             |
| 046M21SP6         | CAGGCTTGACTCTTGGGAAG      | AGAAATGCCAGGGAGTTGTG      | 225           | 58, 1.5             |
| 046M21T7          | TTAATCACCTGGAGGCCAAG      | GAAGTGGGCTGTTCTGCTTC      | 207           | 63, 1.5             |
| 047B23/186F05 int | AGCTGCCAAGACCAAACCTGT     | CTTAGCTGCCCCCTCAGTCAC     | 178           | 63, 1.5             |
| 047B23SP6         | GGCACCCATAAGGAGTCTCA      | GCTCCATCGGAGTGCTGTAT      | 212           | 58, 1.5             |
| 047B23T7          | TCATTGCCTTACAGACTGTTGAA   | GAAGAGGGATTGGACTTGC       | 208           | 55, 1.5             |
| 049J07SP6         | CACTTTTTCTGAGCGCCTTC      | CGCTGTCTGTCTCTCTCCACT     | 161           | 58, 1.5             |
| 049J07T7          | TGCCCCCTCACACACAATTTA     | TGTGCTCCCTCATTTCTCTC      | 168           | 58, 1.5             |
| 056C12SP6         | ATAGGGAATTAAGGGCATGG      | AGCAGGCGGATTCATGTTT       | 150           | 55, 1.5             |
| 056C12T7          | ATGGTCTGGACTCTGGATGC      | TGTTTGCAAAGCGTTTCACT      | 159           | 55, 1.5             |
| 060I06SP6         | AATGCAGACCCAAGCTCATC      | AGTCCATTTCACTGCCAAC       | 229           | 63, 1.5             |
| 060I06T7          | TCCTAACACACAGTGGAGCAG     | ACGGTCATTACAGACGAGGAG     | 52            | TD 60, 1.5          |
| 064I21SP6         | TCAATGGGCTTTTCTCTAGCA     | CCAAGACCCAGTTGACTCT       | 174           | 62, 1.5             |
| 064I21T7          | CAAGTGTCATGAGCTCAGGAAT    | TTTTCTTCATAATGTCATCTTTGTT | 171           | TD 60, 1.5          |
| 081G24SP6         | TTCCAGGCCAATTTAAGTTCA     | GCCAAGTCAGGTGGAGAGTG      | 159           | 55, 1.5             |
| 081G24T7          | AGAGGGGCGAGCTAGGTAAC      | GTCGTCTGGATTTTGCCAAT      | 158           | 55, 1.5             |
| 085N19SP6         | ATCCAGGAGAGGATCTTGG       | TGTGTGAGCCCAACACGAC       | 172           | 55, 1.5             |
| 085N19T7          | GACTCCACATCTGGCTTTGC      | CAGGGGGAGCAGTCTTCAT       | 103           | 55, 1.5             |
| 087G16SP6         | AACAACACTCCCTGGCTCAC      | AGGAATGGGGTCACTCACAG      | 158           | 58, 1.5             |
| 087G16T7          | AGCTTGAGCCCTTAGGCATT      | TTTTCCACCCAGGCATTTAG      | 207           | 58, 1.5             |
| 097.1G07T7        | GCCAGTCCCACTGGATCTTA      | AAGTCAACAGCTCCCCCTTC      | 160           | 55, 1.5             |
| 101K14SP6         | ATCAGCCTGCATTCTCAGGT      | CTGGAATTGGAGTCCCAAGA      | 189           | 63, 1.5             |
| 101K14T7          | GATCTTGGGGGACCTTGAG       | CTTTTCTCTGGCCTCCACTG      | 202           | 63, 1.5             |
| 107D18SP6         | TTCTAGGGCATTAGGGAGCA      | CTGAAGGGAGACTGGCAAAG      | 188           | 55, 1.5             |
| 109A22SP6         | CCTTGCGCTGAGAAACCTAC      | ATCGTGTTTGTGGGAATGT       | 180           | 58, 1.5             |
| 109A22T7          | GATCTTGGGACTTGCTGCTC      | TGCAGATGGATCAAACCAAA      | 215           | 58, 1.5             |
| 114F19SP6         | TCCGGGTGAAGAGAAATGAC      | CAGAATGGAGAGGGATTGGA      | 225           | 58, 1.5             |
| 115E14SP6         | TGGCACCAGGAATATGAACA      | TTGCTTTTGCAGCTTCTTGA      | 250           | 60, 1.5             |
| 115E14T7          | TCCACAATCCGAAATTAGCC      | AAGGAAGAGCTGTCGCGTTA      | 153           | 60, 1.5             |
| 125O11SP6         | ACAGGGGCCTTCAAACCTCTT     | CACCTTTGAGCCTGAGGAAC      | 155           | 58, 1.5             |
| 125O11T7          | GGACCCTCTCTGTGGAATGT      | CGGTCGGTGTTAGACGTCAG      | 245           | 60, 1.5             |
| 127O05SP6         | AGGGTATGCATGAGGTGTCC      | AACCTGTCCACAAGACCTG       | 226           | 55, 1.5             |
| 139F16T7          | CGCCTGGGTGATAGAGAGAC      | CAGGCTGGTTGGATCCTTTA      | 151           | 62, 1.5             |
| 152N03SP6         | GCAGGGACAGTGCTTAGAGG      | CTTCCTCGAGCCCTCAGAC       | 168           | 60, 1.5             |
| 152N03T7          | TGCCTTCCAGGTCTCTTTTC      | CATCTGGGGCTGAAAGGTTA      | 167           | 58, 1.5             |
| 153C05SP6         | GACTGCAATTCCCAAGTGACA     | GTGGGCCAGCAGGTAGAAAC      | 154           | 58, 1.5             |
| 162B03SP6         | CTCCCTGGGAATCCTAGCTT      | TCACAGGTAGCTGTGCAAAATG    | 152           | 58, 1.5             |
| 162B03T7          | AGCGAGGAAGAGCATTTTCAG     | AGCGTGTTGAGAAAATGGT       | 184           | 58, 1.5             |

| STS        | Forward primer (5 –3 )  | Reverse primer (5 –3 )  | Expected size | PCR Condi-<br>tions |
|------------|-------------------------|-------------------------|---------------|---------------------|
| 167K09SP6  | TTCAAAGGGAACACATTCCTG   | CACACCAGCCTGTCACTCTT    | 56            | 60, 1.5             |
| 168H06SP6  | CTTCTACCCAAACCCACCT     | GGGTTACAGGTCAGCAGGAA    | 153           | 58, 1.5             |
| 168H06T7   | GCTCCTTCCTTCATCTGCTG    | GGGAAGGATCCCTTTGATCT    | 184           | 58, 1.5             |
| 172F16SP6  | TGTGCAGGCATCATAAGACC    | AGGAACGATTCCATCACAGC    | 194           | 60, 1.5             |
| 172F16T7   | CCTCCCTGGGAATCCTAGAC    | CAGGTAGCTGTCGAAATGTGA   | 153           | 60, 1.5             |
| 177I18SP6  | TTCCTGTGTCTTCGTGTTGG    | CCAAGTGGTGGTAGGAGGAA    | 150           | 58, 1.5             |
| 177J08SP6  | TTTGGGAAGCCTCAGAAGAA    | CGTGAGGTGGGTGAGAAAAT    | 209           | 58, 1.5             |
| 177J08T7   | CAGACACATGGACCAGCACT    | TTTGAAGGCAAAAATAACAGGTG | 291           | 60, 1.5             |
| 181B11SP6  | TGATGAATTGATCCTCTGCTG   | CTCAGGTGTTGCTTGGGACT    | 152           | 58, 1.5             |
| 182E20SP6  | GGACACCCTGGGATAGATCA    | CAGAGCAGACATGGGGATG     | 100           | 60, 1.5             |
| 182E20T7   | TTGGACCAGAAGTCGAGGTT    | AACGTGTCCACTGCCTCTTC    | 91            | 58, 1.5             |
| 186F05 int | CCTTCTGGTCTCCATGGTTT    | TCCCAAGTTGAGAGAAGGACA   | 223           | 58, 1.5             |
| 186F05T7   | GACCTGCCACCACTGAGAAT    | AAAGTGTCCCTCCTGCACAC    | 197           | 58, 1.5             |
| 195I22T7   | TCTCCTCTCTGGCTCTTTTCG   | ATTTGAATGGACTCGGGAAA    | 100           | 55, 1.5             |
| 219J06SP6  | AGAGGTGACCCGGGTTTAGT    | ACATCACCTCCCTCCCTTCT    | 117           | 58, 1.5             |
| 219J06T7   | CCTTCGGTTCATCTCTCGTC    | ACGCTGAGGCACCATCTTAT    | 206           | 62, 1.5             |
| 229L17T7   | GCCTCACCACTTGTCTTAA     | AGAGGGTCCAAGCTCTCCAG    | 186           | 58, 1.5             |
| 230C10SP6  | ATCGGAACTACAACCCATC     | CCGCCTCTTTCTTTTCTTC     | 132           | 58, 1.5             |
| 230C10T7   | GTCCAGCTTCCCTGTGACC     | CCTTGACAACGTCCAGTCCT    | 116           | 60, 1.5             |
| 230H17SP6  | TCAGAGTGGACCACAGCATC    | GTCGGACTTCGTCTTGTGT     | 171           | 60, 1.5             |
| 230H17T7   | CGACCTGGTCATTGAGAAC     | CATGAGAGGGCCCAGAGTT     | 150           | 58, 1.5             |
| 232K12SP6  | CAGGGCCACTCATGTGTCTA    | ACTCATCAGCCTCCACACCT    | 103           | 58, 1.5             |
| 238A18SP6  | GAAAAAGATGGGGCATCTGA    | GAACGCTCCTTGTGAATGGT    | 151           | 55, 1.5             |
| 238A18T7   | ACAGGGATGCAGAAGTGTCC    | GGACTGGGCAGGGAAGATAC    | 157           | 58, 1.5             |
| 238I22SP6  | CCTGCATTCGGGTACTGTTT    | ACATCCAGCTGACCTCGTCT    | 141           | 58, 1.5             |
| 238I22T7   | AGGAAGGAGCCTGACCCTAC    | CTGTTTCAGGAAACCCAAGG    | 189           | 60, 1.5             |
| 242J14T7   | GCAGAGGCAAGAGAAATTGG    | TCCCATCAGGAATCCAGAAA    | 152           | 58, 1.5             |
| 265C11SP6  | TTTCACAGTTTTGGCAATATGAA | TGCTTGGGGGTTAATAGCAC    | 102           | 58, 1.5             |
| 265C11T7   | GGGGGCACTATGCTTTATCA    | GGAAATGACCGTCCTTAGCA    | 182           | 58, 1.5             |
| 276A04SP6  | CCACTGGAAGTGTGGGAGAT    | AGCAGCAGGAAATCTCACTTG   | 194           | 58, 1.5             |
| 311I15SP6  | CGACCTGGTCATTGAGGAAC    | CATGAGAGGGCCCAGAGTT     | 150           | 60, 1.5             |
| 311I15T7   | CAGCTCACCTCGGAGTACAG    | CTCAGAGGTGGTGGCAGAC     | 153           | 60, 1.5             |
| 325D24SP6  | AAACTGAGGCCAGGAGAGGT    | ATTCCCAGGATGAAGGTTCC    | 123           | 62, 1.5             |
| 325D24T7   | CTTAGTCAAAACCCGGCCATA   | AAACAGGGAGACACCCAAGA    | 203           | 60, 1.5             |
| 326D04SP6  | ACACCAGAAAATGCCACCAT    | GTGCTTGGGACTGAAGGAAG    | 216           | 58, 1.5             |
| 326D04T7   | GGAGAGTGACGTCAGCAACA    | TCCGATGTATAGCAGCATGG    | 153           | TD 60, 2.0          |
| 338D15SP6  | CTAGGGGGTGAGCACAAAAG    | TGCCTATGCCCTCATCTTTC    | 163           | 60, 1.5             |
| 338D15T7   | TGCACATCCCTTGTAGGTGA    | CCCTACATCATCCTCGCAAT    | 176           | 60, 1.5             |
| 394J21SP6  | GTAGGTGGGCCCCTAAACTC    | GAAAGGACCATCCTCAGACCA   | 109           | 58, 1.5             |
| 394J21T7   | CTGAACTCCAGCACCATCCT    | TACCGTGCACTTGGTGATGT    | 153           | 58, 1.5             |
| 408C14SP6  | TCAATGGGCTTTTCTCTAGCA   | CCTAACCATCCAATGCCAAG    | 221           | 55, 1.5             |
| 408M24SP6  | GGAAGAAATTCCCGGCTTAG    | GGCCCTTTTCTCTTTGCTT     | 242           | 57, 1.5             |
| 408M24T7   | AGGCCACTCTCTGCACTACG    | CTCAAGCCAAGCAGGAAAAAC   | 178           | 62, 1.5             |
| 412B24SP6  | TAGGAGTTGCCTGGTCTGCT    | ACTTGTGGAGTGCCCAAAAC    | 156           | TD60, 2.0           |
| 431M22SP6  | TATCGTCAGGGAAAAGGCAAC   | TGCTTCCATCTCATCATTGC    | 132           | 58, 1.5             |
| 431M22T7   | CATAAATCCAGCCCCTGGTA    | TCCTGTGCGTCAGCCTTAAT    | 156           | 55, 1.5             |
| 493B19SP6  | CAAACCAATGCCATTTTGAA    | CACTGGCCATGTCTCAGCTA    | 158           | 55, 1.5             |
| 501I16T7   | CGATCCTTTTCTGGGATTCA    | TTCGGCTGGAAAGAGAGAAA    | 202           | 57, 1.5             |
| 506J16SP6  | ATATCGTAACGCACCAAGCA    | AGTCCTCTCGGCAATTCAAA    | 151           | 55, 1.5             |
| 506J16T7   | ACAAGTGAGTCCCCATGTCC    | CTGGCCACCTTCATCTAGGA    | 165           | 55, 1.5             |
