# Supplementary material
Source: publisher figshare collection journal article supplement (https://karger.figshare.com/articles/dataset/_/5120371)
Supplement: Supplementary file 3 [file 1]

**Table 3.** Detailed information regarding gene and microsatellite markers mapped on the ECA21 contig including Ensembl or horse EST ID of sequence used for primer design, amplicon sizes, and PCR conditions (TD designates that a touchdown program was used).

| Accession number       | Ensembl/Horse EST ID             | Gene symbol      | Primers 5 –3                                                | Product size | PCR conditions |
|------------------------|----------------------------------|------------------|-------------------------------------------------------------|--------------|----------------|
| NM_024527              | Plate22-H19-M13R.ab1             | <i>ABHD8</i>     | F: CGCTTACTGGTGGAGAACCT<br>R: GTCTGCCAGCTCCACCTC            | 105          | 55, 2.0        |
| NM_005858 <sup>a</sup> | ENSCAFT00000025526               | <i>AKAP8</i>     | F: ACCAGCGTTTGGACATGATG<br>R: ATAGTCGTAGCTGTAGCTGG          | 710          | 58, 2.0        |
| NM_032493              | Plate32-D10-M13R.ab1             | <i>AP1M1</i>     | F: ATCACTCAGGAAGGCCACAA<br>R: CCTCGTTCTTCCGGTACTTG          | 109          | 60, 1.5        |
| NM_020410              | Plate9-K09-M13.rgy.ab1           | <i>ATP13A1</i>   | F: AAAGTCACTGGCCCTGGAG<br>R: CCACACATGAGGGTCACGTA           | 266          | 60, 1.5        |
| NM_014299              | CT02042A2E08.f1.ab1              | <i>BRD4</i>      | F: GAGATGCGTTTTGCCAAGAT<br>R: CGCTCCTCCTCAGAGTCATC          | 170          | 58, 1.5        |
| NM_031966 <sup>b</sup> |                                  | <i>CCNB1</i>     | F: CAAAATACCTACTGGGTCCG<br>R: AATTTCTGGAGGGTACATTTCT        | 704          | 58, 1.5        |
| NM_001799              | LeukoS5_2_C03.g1_A027            | <i>CDK7</i>      | F: CAACTTGTTGCTAGATGAAAATGG<br>R: GGTCCACAACCTGATGTGTATAAGC | 103          | 60, 1.5        |
| NM_006387              | ENSCAFT00000024839               | <i>CHERP</i>     | F: GGAGCTTCGAAATGTCATCG<br>R: CGCCAGCTTGCACTTGTAGT          | 154          | 60, 1.5        |
| NM_153221              | CT020018A20B09.ab1               | <i>CILP2</i>     | F: CTCCTCCGATGGCTTCTCTA<br>R: CATCTCCCTGCGGATATCAT          | 151          | 60, 1.5        |
| NM_000095              | ENSCAFT00000023228               | <i>COMP</i>      | F: GGACAAGGTGGTGGACAAGA<br>R: TTCATGGTCTGCACGATCTC          | 353          | TD 60, 2.0     |
| NM_007263              | MONO1_16_E08.g1_A005             | <i>COPE</i>      | F: TCAACCTCATTGTCCTGTCG<br>R: CTTCACTGGGACAGGTAGC           | 507          | 62, 1.5        |
| NM_004831              | CT020013B10B07.ab1               | <i>CRSP7</i>     | F: CCGGCAAAGTGAGTTCAGA<br>R: GTGCTTCGGTTGCTGTGTTA           | 167          | 60, 1.5        |
| NM_006532              | ENST00000262809                  | <i>ELL</i>       | F: CTGATTTCATCGACCCCTA<br>R: CCCAGGTCATTGCTGACAT            | 232          | 60, 1.5        |
| NM_014077              | SM0056-2_A06_02.ab1              | <i>FAM32A</i>    | F: AGGACAAGGACAAGGCGAAG<br>R: CCGTTTCTCCTGCATCTTCT          | 128          | 60, 1.5        |
| NM_012181              | ENST00000222308                  | <i>FKBP8</i>     | F: CACGGAGACCGCCTTGTA<br>R: AGCGATGACCACAGAGAGTG            | 562          | 60, 1.5        |
| NM_173483              | OTTHUMT00000151074               | <i>FLJ39501</i>  | F: GCATCGGACAGAGCTTCG<br>R: GCTCCACCTTGAGCCAGA              | 153          | TD 60, 2.0     |
| NM_016573              | ENSCAFG00000014170               | <i>GMIP</i>      | F: TACGACGCCTTCATCTCTCT<br>R: GTTGTTGGCAGACATCTTGTT         | 570          | 60, 1.5        |
| NM_015965              | CT020003A10_PLATE_H08_64_075.ab1 | <i>GRIM19</i>    | F: GGAGAACCTGGAGGAGGAAG<br>R: CCGTAGGTGGCATTGAGAAT          | 389          | 60, 1.5        |
| NM_032620              | LeukoS1_6_B12.g1_A023            | <i>GTPBP3</i>    | F: CGTACAGCTGCAACTTCCTG<br>R: ACTTCAGCCAGCTCCTTCCT          | 223          | 60, 1.5        |
| NM_005543 <sup>a</sup> | ENSCAFG00000015159               | <i>INSL3</i>     | F: CTTCCAGAGGGAGATCCAGA<br>R: CTGGGCAGGTACTCCATCA           | 562          | 58, 1.5        |
| NM_000215 <sup>a</sup> |                                  | <i>JAK3</i>      | F: CTGCGGTTGGTCATGGAGTA<br>R: GAAGTCGGCGATCTTGACGT          | 486          | 58, 1.5        |
| NM_005354 <sup>a</sup> |                                  | <i>JUND</i>      | F: ATCGACATGGACACTCAGGAG<br>R: GCTGAGGACCTTCTGCTTGA         | 210          | 58, 1.5        |
| NM_002248              | ENSCAFT00000023962               | <i>KCNN1</i>     | F: AGCAGGAAGTGACCAGCAAC<br>R: ATGCCAGTGAGCAGACACAC          | 127          | 60, 1.5        |
| XM_048457              | CT020016B20F06.ab1               | <i>KIAA0892</i>  | F: TTTCTTTGCTTCTAGGGCATTTTAC<br>R: AGGGTGATCACTAAAAGCACTT   | 100          | 55, 2.0        |
| NM_004831 <sup>a</sup> |                                  | <i>KLF2</i>      | F: AGAAGCCCTACCACTGCAAC<br>R: CTACATGTGCCGCTTCATG           | 173          | 58, 1.5        |
| NM_138442              | CT020014A20D10.ab1               | <i>LOC115098</i> | F: CAGGGATGCCCAAGAAGTT<br>R: GCTCCTTCCTCATGACGTGT           | 156          | 62, 1.5        |
| NM_012321              | Plate17-F24-M13.rgy.ab1 653      | <i>LSM4</i>      | F: ACAAGTTCTGGCGGATGC<br>R: CCTTCTGCTGCTTCTGCTG             | 150          | 58, 1.5        |
| NM_018467              | ENST00000263897                  | <i>MDS032</i>    | F: GGACCAGAACCTGGAGAACTG<br>R: GCAGACGATAATGAGCATG          | 103          | 60, 1.5        |
| NM_025021              | ENST00000321949                  | <i>MECT1</i>     | F: ATGGAGAACGCCATCAGC<br>R: AGGATGATGTTGGGGATGC             | 158          | 60, 1.5        |

| Accession number       | Ensembl/Horse EST ID        | Gene symbol                          | Primers 5 –3                                              | Product size | PCR conditions |
|------------------------|-----------------------------|--------------------------------------|-----------------------------------------------------------|--------------|----------------|
| NM_005919              | ENST00000162023             | <i>MEF2B</i>                         | F: CTGAGAGCGTCTACGTCCTG<br>R: CTGCAGGCGTACTCCACAGT        | 1120         | 60, 1.5        |
| NM_024104              | CT04003X1G10.f1.ab1         | <i>MGC2747</i>                       | F: CTGGAAAACCGGTGACCTT<br>R: GGAACCCCTCCTGAAACTCCT        | 170          | 60, 1.5        |
| NM_004145 <sup>a</sup> |                             | <i>MYO9B</i>                         | F: CTGTTCTCCTGCAGAGCTGGTT<br>R: CAGGCGGATGATGCTCAGT       | 213          | 60, 1.5        |
| NM_000435              | ENSCAFT00000025565          | <i>NOTCH3</i>                        | F: GTGGGCTCCTTTTCGTGCT<br>R: CAGTGGAAGCCTCCATAACC         | 161          | 58, 1.5        |
| NM_017660              | Plate19-A20-M13.rgy.ab1     | <i>p66alpha</i>                      | F: CACACGTTTCAGCCAGTCG<br>R: CAGTTGGAGGTGGCGTTG           | 122          | 62, 1.5        |
| NM_024050              | CT02041A1F05.f1.ab1         | <i>PCIA1</i>                         | F: CGCCAAGAAGAGAGACCAG<br>R: CGAGGAGCAGACAAGACAGG         | 150          | 60, 1.5        |
| NM_012088              | Plate17-K03-M13.rgy.ab1 416 | <i>PGLS</i>                          | F: GGGCCTCATCTCTGTCTTCTC<br>R: CCACCAGTTGGGCTAGGG         | 62           | 58, 1.5        |
| NM_005027 <sup>a</sup> |                             | <i>PIK3R2</i>                        | F: AGGGAGAGTACACGCTGAC<br>R: TTGGACACTGGGTAGAGGAG         | 656          | 58, 1.5        |
| NM_000980              | Plate26-A08-M13R.ab1        | <i>RPL18A</i>                        | F: ACTGCGGGTGAAGAACTTTG<br>R: CTGCGATCTCCTCCACTTTC        | 879          | 60, 1.5        |
| NM_014884 <sup>a</sup> |                             | <i>SFRS14</i>                        | F: CCCAACTTTTCCAGACTCTC<br>R: ACTCTGGGTGTTTTCAAAGC        | 151          | 58, 1.5        |
| U90593 <sup>c</sup>    | (microsatellite)            | <i>SG14</i>                          | F: CCCCACTGGTTCCATTTAGATGT<br>R: GGGGAGAGCATTTTGGTGA      | 188          | 58, 3.0        |
| U90594 <sup>c</sup>    | (microsatellite)            | <i>SG16</i>                          | F: AATTCTCAAATGGTTCAGTGA<br>R: CTCCCTCCCTTCCTTCTA         | 190          | 58, 2.0        |
| NM_032627              | CT020008A20D09.ab1          | <i>SSBP4</i>                         | F: ACCAACTCCAGCGAGAACAT<br>R: GATCCGTTTCACGTGGTGAG        | 231          | 60, 1.5        |
| AB048331 <sup>d</sup>  | (microsatellite)            | <i>TKY021</i>                        | F: AGGTGAACCCAGAGAGTCC<br>R: AGTGAGGCCTCGGTTGGGAG         | 117-132      | 58, 2.0        |
| AB103896 <sup>e</sup>  | (microsatellite)            | <i>TKY678</i>                        | F: TAAAAGAAGGGGGTAATGGG<br>R: TGTGGTGCTTGTTCCAGCA         | 207          | 58, 1.5        |
| NM_024074              | SM0051-2_E05_09.ab1 576     | <i>TMEM38A</i><br>( <i>MGC3169</i> ) | F: CTCTCACAGCTCCCCTTTTG<br>R: AGCTCCTCCTTGGACTIONTGGT     | 162          | 58, 1.5        |
| NM_003290              | ENSP00000300933             | <i>TPM4</i>                          | F: TGA AAAAGGAGGACAAATATGAAGA<br>R: CCAGTTTTTGCAACCGTTCTC | 189          | TD 60, 2.0     |
| AY464530 <sup>f</sup>  | (microsatellite)            | <i>UMNe564</i>                       | F: GAATACAGGGGCTTTTCTGTC<br>R: TTCTGCATCTTGATTGCAGTG      | 223          | 58, 1.5        |

<sup>a</sup> Brinkmeyer-Langford et al., 2005.

<sup>b</sup> Goh et al., 2007.

<sup>c</sup> Godard et al., 1997.

<sup>d</sup> Kakoi et al., 1999; Swinburne et al., 2000.

<sup>e</sup> Tozaki et al. in preparation.

<sup>f</sup> Wagner et al., 2004b.
