# Supplementary material
Source: publisher figshare collection journal article supplement (https://karger.figshare.com/articles/dataset/_/5120371)
Supplement: Supplementary file 4 [file 1]

**Table 1.** Overgo primers used to identify BAC clones containing equine orthologs of selected genes from HSA19 and HSA5. Gene name in parentheses is an alternate symbol used for the gene. Column labeled “Gene ID” lists the identification number of the sequence used for overgo design.

| Gene symbol         | Accession #<br>(ENSEMBL or NCBI) | Forward overgo primer (5 –3 ) | Reverse overgo primer (5 –3 ) |
|---------------------|----------------------------------|-------------------------------|-------------------------------|
| <i>ADAMTS6</i>      | ENSG00000049192                  | GTGTGTAGAGAGCTCTGGTGTCTC      | AGCGGTTGCTTTTGCTGAGACACC      |
| <i>ADAMTS6</i>      | ENSG00000049192                  | GCATACTTCAGACAGATGTGTGTGT     | GTCTTGGCAGGTCTTACAACACA       |
| <i>AKAP8</i>        | ENSG00000105127                  | TCTGACTCTCTCATTGCCAAGATC      | TGTCCAAACGCTGGTTGATCTTGG      |
| <i>ASF1B</i>        | ENSG00000105011                  | CGAGCCCTTTCCACAGCCCTTCC       | AAGTGATCTCGAACCGGAAGGGG       |
| <i>CCDC105</i>      | ENSG00000160994                  | CCCTGGCGCTTTCGTGTGGAGATG      | TGCTGCCCCCTTTGAGCATCTCCA      |
| <i>CDK7</i>         | ENSG00000134058                  | AGTCTTGTGCTGACACCATCACAC      | ACATGTAGGCTTTGATGTGTGATG      |
| <i>CHERP</i>        | ENSG00000085872                  | ATGACAGCAAGCCTCCCATCCAGA      | TCTGAAGAGCCAGGCATCTGGATG      |
| <i>COMP</i>         | ENSG00000105664                  | TTCTCCCAGGAGAACATCATCTGG      | GGTAACGCAGGTTGGCCCCAGATGA     |
| <i>COPE</i>         | ENSG00000105669                  | TGACACAGTGATAGAGAATTGCTA      | CATCTCTGGAAGATTAGTAGGGC       |
| <i>CRLF1</i>        | ENSG00000006016                  | CTCTTTACGCCCTATGAGATCTGG      | GGTTGGTGGCCTCCACCCAGATCT      |
| <i>CRTC1</i>        | ENSG00000105662                  | GAGCAGTTCAACATGATGGAGAAC      | TGCTGGAGCTGATGGCGTTCTCCA      |
| <i>CYP4F11</i>      | ENSG00000171903                  | CACTGCCCATCCTTGCCCTTTCC       | AAGCTCCAAGGACAGTGGAAGGG       |
| <i>CYP4F22</i>      | ENSG00000171954                  | CGTCCTGCCACTGTTGGTTCTGGT      | GATATAGTCAGGGTGCACCAGAAC      |
| <i>DDX39</i>        | ENSG00000123136                  | CATGGAGGTGTTGTAGACGACGA       | CAGTGTGAGCTTGGTCTCGTCGTC      |
| <i>ELL</i>          | ENSG00000105656                  | GAAGGTTCAAGTTTCGGAACCCAGC     | GTCTGTTGCACCTGGGGCTGGTTT      |
| <i>EMR3</i>         | ENSG00000131355                  | GACAAGGGATTTCATCTGGAGTTTC     | CACAGACAGGGCCCCAGGAACTCC      |
| <i>ERBB2IP</i>      | ENSG00000112851                  | TGGCAGAGTGATAGAGAATTGCTG      | GCTCTACAACACTCTCACAGCAATT     |
| <i>F2RL3</i>        | ENSG00000127533                  | ACTCTATGGTCACATGTATGGCTC      | GGCCAGCAGCAGCACTGAGCCATA      |
| <i>FKBP8</i>        | ENSG00000105701                  | GCCCTGTACCGGAAAATGCTGGGC      | GCAGCCGGCTGGGGTTGCCAGCA       |
| <i>GMIP</i>         | ENSG00000089639                  | TGAGGTTATCCGCTCGCTGAAGAC      | CAGCTGTACCAAGAGGGTCTTCAG      |
| <i>GTPBP3</i>       | ENSG00000130299                  | TCTGACTTGGCCTCTCCGTACAGC      | TGTCCAGGAAGTTGCAGCTGTACG      |
| <i>HAPLN4</i>       | ENSG00000187664                  | AACGCCGAGGAACGCTACGACGCC      | TGGACGTGAAGCAGAAGGCGTCGT      |
| <i>INSL3</i>        | ENSG00000105639                  | ACAGCGGGCCAGACCAGCAGAGGG      | ATCTCCCGCTGAAAGTCCCTCTGC      |
| <i>JUND</i>         | ENSG00000130522                  | AGAAAGTCCTCAGCCACGTCAACA      | AGCAGCTGGCAGCCGCTGTTGACG      |
| <i>KCNN1</i>        | ENSG00000105642                  | GGGTTTCGGAACACACGCGTAAGT      | TGGATGGCTTGGAGGAACCTACGC      |
| <i>KIAA0892</i>     | ENSG00000129933                  | TCTTTCACTGGCTGCCAAGGAAC       | ACAAGCACACACATGTGTTCTTG       |
| <i>KLF2</i>         | ENSG00000127528                  | ACGACCTCAACAGCGTGCTGGACT      | CCCATGGACAGGATGAAGTCCAGC      |
| <i>LOC388524</i>    | ENSG00000205246                  | TCTCTTCTGTTCCGCGTCTCCAC       | ACCAGGGGCTACCGAGGTGGAGGA      |
| <i>LSM4</i>         | ENSG00000130520                  | AGTGCTACATCCGCGGCAGACCA       | ATGCGCAGGTACTTGATGGTGCTG      |
| <i>MAP1S</i>        | ENSG00000130479                  | GTCAATGGCTTCACTGTGCTGGTC      | GGTTTGAGCCACCGTTGACCAGCA      |
| <i>MAST4</i>        | ENSG00000196567                  | TGGAACAGTTTGCTGAGACAGAAG      | GGGGAATAAATTCTGCCTTCTGTC      |
| <i>MEF2B</i>        | ENSG00000064489                  | AAGTTCGGGCTGTGAAGAAAGCT       | GCACGCTCAACTCGTAAGCTTTCT      |
| <i>MYO9B</i>        | ENSG00000099331                  | TTCCGGGAGAAGAACATGGACTAC      | CGATGTCTGGCCGCTAGATTCCA       |
| <i>NLN</i>          | ENSG00000123213                  | ATGGACATGCTCCACAATTTCTTG      | GGTTTGCTCACGTTTCAAGAAAT       |
| <i>NOTCH3</i>       | ENSG00000074181                  | CCCTTTGCAACGTGGAGATCAATG      | GGGCTGGACGCACACTCATTGATC      |
| <i>OCLN</i>         | ENSG00000197822                  | TCCACCTATCACTTCAGATCAACA      | CTTGACAGTTGTCTTTGTTGATC       |
| <i>PGLS</i>         | ENSG00000130313                  | TGGTCCAGCCCACTGGGAAAC         | TCCAGGAACCAGCAGAGTTTCCCA      |
| <i>PIK3R1</i>       | ENSG00000145675                  | GACTGTGAATAAAGGGTCCTTAGT      | ACTGAATCCAAGAGCTACTAAGGA      |
| <i>PIK3R2</i>       | ENSG00000105647                  | GCAGTACCAGGACAAGAGCCGCGA      | ATAAAGCTGGTCATACTCGCGGCT      |
| <i>PTGER1</i>       | ENSG00000160951                  | TGTACATCCTGCTGCGCCAGGCGG      | AGCAGTTGGCGCAGCACCGCCTGG      |
| <i>SDCCAG10</i>     | ENSG00000153015                  | TTGCACTGCTGAACCAAGTTTAAAT     | GCTTGAGTGAGTTTAGATTAAAC       |
| <i>SFRS12</i>       | ENSG00000153914                  | CTCAGGCTGCAGCTAAGGAGTTAG      | CGCTTCATTACTTCTCTAACTCC       |
| <i>SFRS14</i>       | ENSG00000064607                  | TCGGAAGAGGATCAGCAGCAAGTC      | CATGCCAACCTTCAATGACTTGCT      |
| <i>SLC30A5</i>      | ENSG00000145740                  | GATTAATATCATACCGAGACCCTC      | GAATGACGCCAAAAATGAGGGTCT      |
| <i>TAF9</i>         | ENSG00000185057                  | AACCACGCTAGGCAAGAAGCTTGC      | CAGTCTGATCTTGATGCAAGTTC       |
| <i>TMEM38A</i>      | ENSG00000072954                  | ACATGTCTTTCCCCACCAAGGCCA      | ATGGCTCCATACAGGCTGGCCTTG      |
| <i>TPM4</i>         | ENSG00000167460                  | GTGGGCTTACATCAGACACTGGAT      | GTTGCTTTAGTGTCTGATCCAGTG      |
| <i>TRIM23</i>       | ENSG00000113595                  | TTGGGATGTAGGTGAAAAACAAA       | CCACAATGGTCTTAATTTGTGTTT      |
| <i>TSSK6 (SSTK)</i> | ENSG00000178093                  | CTCTACGTGCTGATGACCGGGTGC      | AGTCATCGAAGGGCATGCACCCGG      |
| <i>UNC13A</i>       | ENSG00000130477                  | TACTACGCACACACCACCGCTCC       | AGGCAGACACGTTGGTGGAGGCGG      |
| <i>USE1</i>         | ENSG00000053501                  | AACCAGTTCTTGCCCTTGCCGT        | TGGCTGTGGTTGGCACGCGGCCAG      |
| <i>ZNF14</i>        | ENSG00000105708                  | TTCTTGCCCATGGGAAGATTGCG       | TCAGGAGCAGGTGAAACGCAATCT      |
| <i>ZNF254</i>       | ENSG00000213096                  | CTGTCGCCGGAGTCCAGGTCTGT       | ACACAGAGCAGTGAAACAGACCT       |
| <i>ZNF506</i>       | ENSG00000198584                  | ATGTACATGTTCTGTTCATGGCC       | TAAATTGCAATGGTCCGGCCATGA      |
| <i>ZNF682</i>       | ENSG00000197124                  | GCAATGTGGCAAAGTCTTTAAATC      | AGAAAGGCCTGAGTGAGATTTAAA      |
